# Supplementary material for: Weak Genetic Structure in Northern African Dromedary Camels Reflects Their Unique Evolutionary History
Source: PLoS One. 2017 Jan 19;12(1):e0168672. doi: 10.1371/journal.pone.0168672 (PMC5245891; doi:10.1371/journal.pone.0168672)
Supplement: S1 Dataset — (XLSX) [file pone.0168672.s014.xlsx]

## Sheet: Feuil1
Genotypic data for the total population sample typed at 19 microsatellite loci.
ID	Country	Sampling site	Population	CVRL4D		CVRL5D		CMS121		CVRL6D		LCA66		CVRL1D		YWLL44		YWLL59		CMS50		CVRL8		CMS9		VOLP10		CVRL7		CMS25		CMS15		CMS18		CMS32		CMS13		VOLP32
1	Egypt	Al Qalaj	Falahy	117	121	107	107	148	150	161	161	236	242	295	295	103	103	107	107	182	182	207	209	235	245	254	262	281	285	90	90	141	141	158	164	197	205	240	254	261	263
2	Egypt	Al Qalaj	Falahy	107	121	107	119	150	168	161	161	240	242	285	295	103	107	107	107	172	184	207	207	241	245	254	260	281	283	90	100	123	123	158	158	205	205	240	250	261	261
3	Egypt	Al Qalaj	Falahy	107	107	119	119	148	150	161	161	240	242	303	317	103	103	105	107	148	174	207	209	231	231	260	260	281	281	90	94	139	141	158	158	197	205	250	254	261	263
4	Egypt	Al Qalaj	Falahy	117	117	119	127	148	148	161	161	242	242	299	305	103	111	107	107	182	182	207	209	231	241	260	266	281	285	90	94	117	117	158	158	197	205	250	254	263	263
5	Egypt	Al Qalaj	Falahy	107	107	107	113	150	150	161	161	242	242	317	317	103	103	107	107	180	184	207	207	235	235	254	254	281	281	90	94	?	?	158	158	205	207	252	252	261	263
6	Egypt	Al Qalaj	Falahy	117	117	107	117	150	162	159	161	238	238	313	313	103	107	105	107	148	182	207	207	231	245	254	262	281	281	90	90	135	139	158	160	197	207	252	256	263	263
7	Egypt	Al Qalaj	Falahy	107	121	107	115	150	166	157	161	236	242	297	307	103	107	105	107	172	174	207	207	235	245	254	262	285	285	90	94	139	145	158	158	205	205	252	254	263	263
8	Egypt	Al Qalaj	Falahy	117	129	107	113	148	168	161	161	238	240	303	317	103	105	107	107	148	184	207	207	231	231	252	252	281	281	90	90	123	137	158	164	195	207	250	252	263	263
9	Egypt	Al Qalaj	Falahy	107	121	107	115	150	166	157	161	236	242	297	307	103	107	109	109	172	174	207	207	235	245	254	262	285	285	90	94	139	145	158	158	205	205	248	250	261	261
10	Egypt	Al Qalaj	Falahy	107	117	119	127	148	148	161	161	240	242	299	309	103	103	107	107	148	182	207	209	231	245	260	264	277	285	90	94	123	141	160	164	205	205	250	250	259	261
11	Egypt	Al Qalaj	Falahy	117	121	107	107	148	168	161	161	238	240	293	297	105	105	105	107	184	188	207	207	235	235	254	254	277	285	90	94	123	139	158	158	197	197	252	252	261	261
12	Egypt	Al Qalaj	Falahy	117	121	107	107	148	168	161	161	238	240	293	297	105	105	107	107	184	188	207	207	235	235	254	254	277	285	90	94	?	?	158	158	197	197	252	252	261	261
13	Egypt	Al Qalaj	Falahy	?	?	119	119	148	162	161	161	238	242	317	317	105	109	107	107	148	182	207	209	231	235	258	260	279	285	90	94	141	141	158	158	199	205	240	244	261	261
14	Egypt	Al Qalaj	Falahy	117	121	107	119	148	168	161	161	238	240	293	297	103	105	105	107	182	184	207	207	231	245	262	264	277	281	90	94	139	139	158	158	199	199	250	250	259	259
15	Egypt	Al Qalaj	Falahy	107	117	107	107	148	150	161	161	242	242	309	311	103	113	105	107	148	148	209	209	241	245	262	264	281	281	90	94	123	141	158	158	205	207	238	252	259	261
16	Egypt	Al Qalaj	Falahy	107	117	107	119	146	150	161	161	238	242	285	285	103	105	107	107	174	178	209	209	235	245	262	266	285	285	90	94	135	139	158	158	205	207	252	252	261	263
17	Egypt	Al Qalaj	Falahy	107	117	107	113	150	152	159	161	240	242	317	317	103	105	107	107	174	174	209	209	231	231	252	260	281	285	90	94	139	141	158	164	197	205	250	254	263	263
18	Egypt	Al Qalaj	Falahy	117	117	107	115	150	150	161	161	238	240	285	317	103	105	107	107	148	180	207	207	231	245	260	262	277	285	90	94	139	139	158	158	205	205	250	252	261	263
19	Egypt	Al Qalaj	Falahy	107	121	107	107	148	148	161	161	238	238	297	317	105	111	105	107	174	180	207	209	241	243	252	260	281	281	94	94	123	145	158	160	207	207	248	250	259	259
20	Egypt	Al Qalaj	Falahy	107	117	119	119	148	150	157	161	240	244	305	317	103	103	107	107	172	174	207	209	231	231	252	266	281	283	90	94	123	139	158	158	205	205	248	252	259	261
21	Egypt	Al Qalaj	Falahy	107	107	119	119	148	162	161	161	238	242	317	317	105	109	107	107	148	182	207	209	231	235	258	260	279	285	90	94	141	141	158	158	197	205	244	250	263	263
22	Egypt	Al Qalaj	Falahy	117	129	107	113	148	168	161	161	238	240	303	317	103	105	105	107	148	184	207	207	231	231	252	252	281	281	90	90	123	137	158	168	195	207	252	254	263	263
23	Egypt	Al Qalaj	Falahy	107	117	119	119	148	150	157	161	240	246	305	317	103	103	107	107	172	174	207	209	231	231	252	266	281	283	90	94	123	141	158	158	205	205	250	250	259	261
24	Egypt	Iking Maryut	Maghraby	107	117	117	119	148	168	161	161	238	240	285	307	103	105	105	107	148	182	207	207	235	245	260	262	281	285	94	100	139	139	164	164	205	207	252	252	263	263
25	Egypt	Iking Maryut	Maghraby	117	121	105	107	164	168	161	161	238	240	317	325	103	105	105	107	182	184	207	207	231	245	260	262	277	281	90	94	139	141	160	164	197	207	244	254	263	263
26	Egypt	Iking Maryut	Maghraby	107	121	105	119	148	166	159	161	238	242	303	317	103	103	105	107	180	182	207	209	245	245	260	262	277	285	94	94	139	139	158	164	205	207	238	252	263	263
27	Egypt	Iking Maryut	Maghraby	107	121	117	119	148	148	159	161	238	242	285	317	103	103	105	105	182	184	207	207	231	231	252	260	285	301	94	94	139	141	158	164	197	205	250	252	263	263
28	Egypt	Iking Maryut	Maghraby	107	121	105	119	166	168	159	161	236	240	285	317	103	103	107	107	148	182	207	209	231	245	260	262	281	285	90	94	123	139	158	164	197	205	240	254	261	263
29	Egypt	Iking Maryut	Maghraby	107	121	119	119	150	168	161	161	238	240	311	317	103	103	105	107	174	182	207	209	235	245	260	266	283	283	94	94	137	141	158	162	199	207	238	248	263	263
30	Egypt	Iking Maryut	Maghraby	121	121	107	119	148	168	159	161	238	244	285	299	103	103	105	107	180	182	207	207	231	245	260	262	285	285	90	94	139	141	158	158	205	207	250	254	263	263
31	Egypt	Iking Maryut	Maghraby	117	121	105	119	146	168	159	161	238	240	285	295	107	107	107	107	148	174	207	209	231	231	254	266	277	281	86	94	139	139	158	164	205	207	244	252	263	263
32	Egypt	Iking Maryut	Maghraby	117	121	107	119	148	148	159	161	238	242	299	317	103	103	107	107	172	182	207	207	231	245	252	262	273	277	90	94	139	139	158	164	197	207	254	256	263	263
33	Egypt	Iking Maryut	Maghraby	117	121	107	119	148	168	159	161	238	242	299	317	103	103	105	107	148	182	207	207	245	245	252	262	277	285	94	94	139	139	158	164	197	197	252	252	263	263
34	Egypt	Iking Maryut	Maghraby	107	117	119	119	150	168	161	161	238	240	285	295	103	107	105	107	180	186	207	207	231	231	254	260	277	281	90	94	117	139	158	160	205	207	252	252	263	263
35	Egypt	Iking Maryut	Maghraby	107	117	119	121	148	168	161	161	238	240	293	295	103	103	105	107	174	182	207	207	231	245	254	260	277	277	90	90	139	141	158	164	197	205	244	254	261	263
36	Egypt	Iking Maryut	Maghraby	125	125	119	119	152	160	159	161	238	242	301	317	103	107	107	107	180	182	207	207	235	245	252	260	273	281	90	94	137	139	158	164	205	205	236	250	261	261
37	Egypt	Iking Maryut	Maghraby	107	107	107	119	148	150	161	161	240	242	?	?	107	107	109	109	148	174	?	?	231	231	254	268	277	281	90	90	139	139	158	158	197	205	236	250	259	261
38	Egypt	Iking Maryut	Maghraby	117	117	119	119	152	162	161	161	240	244	317	317	105	105	107	107	182	188	207	207	231	231	252	262	277	285	90	100	139	139	158	158	197	205	252	254	263	263
39	Egypt	Iking Maryut	Maghraby	127	127	107	119	150	150	161	161	236	240	305	329	103	103	105	107	148	182	209	209	231	235	254	254	281	297	94	98	139	139	158	158	205	207	248	252	263	263
40	Egypt	Iking Maryut	Maghraby	107	107	119	119	150	168	161	161	238	240	309	317	103	107	107	107	148	188	207	207	235	241	254	254	281	281	90	94	141	145	158	158	197	207	248	252	263	263
41	Egypt	Iking Maryut	Maghraby	107	107	107	121	168	170	161	161	240	242	317	317	103	103	105	107	188	188	207	209	245	245	260	262	281	285	90	100	117	139	158	160	205	205	250	250	263	263
42	Egypt	Iking Maryut	Maghraby	117	121	107	107	148	160	161	161	238	240	295	307	103	107	105	105	172	184	207	207	235	235	252	260	273	285	94	94	139	141	158	164	197	207	240	250	263	263
43	Egypt	Iking Maryut	Maghraby	107	117	119	123	150	168	155	161	240	240	313	317	103	107	107	107	182	184	207	209	235	245	260	262	285	297	90	90	137	139	158	158	205	205	242	246	261	261
44	Egypt	Iking Maryut	Maghraby	107	117	113	119	148	168	161	161	240	240	299	321	103	105	105	107	182	184	207	209	245	245	258	260	277	277	94	94	123	139	158	158	205	205	238	250	261	263
45	Egypt	Iking Maryut	Maghraby	107	107	119	119	148	150	157	161	240	242	285	317	103	105	107	107	148	190	207	207	231	245	252	254	277	281	90	94	121	121	158	160	205	207	252	252	263	263
46	Egypt	Iking Maryut	Maghraby	117	121	119	119	152	168	159	161	238	238	317	321	103	103	105	105	148	180	207	207	231	249	260	260	277	285	90	94	139	141	160	164	195	207	250	252	261	261
47	Egypt	Iking Maryut	Maghraby	117	117	113	119	148	148	161	161	240	240	307	309	103	105	107	107	184	184	207	207	231	245	262	266	277	277	90	94	137	139	158	158	199	207	246	248	261	261
48	Egypt	Iking Maryut	Maghraby	107	117	107	119	164	168	161	161	240	242	285	303	103	111	105	107	148	180	207	207	231	231	254	262	273	285	90	90	139	141	158	158	197	205	252	254	263	263
49	Egypt	Iking Maryut	Maghraby	107	121	107	117	150	150	161	161	242	242	317	323	103	103	105	107	148	182	207	209	245	245	262	262	285	293	94	94	137	139	158	158	207	207	238	252	261	263
50	Egypt	Iking Maryut	Maghraby	107	107	119	119	148	148	161	161	238	240	295	317	105	105	107	107	182	184	207	207	231	245	256	266	277	277	90	90	143	143	158	158	205	205	238	242	261	263
51	Egypt	Iking Maryut	Maghraby	107	107	107	119	148	168	161	161	238	238	285	299	103	105	107	107	148	180	207	209	231	235	252	260	281	281	90	94	123	137	158	158	197	207	252	254	261	263
52	Egypt	Iking Maryut	Maghraby	107	117	107	113	150	150	161	161	240	242	317	317	105	107	105	105	182	182	207	207	231	235	256	262	281	281	90	94	139	141	162	162	205	205	236	248	261	261
53	Egypt	Iking Maryut	Maghraby	107	117	119	119	152	160	161	161	236	244	285	305	101	103	105	107	174	182	207	207	231	231	260	262	277	277	94	94	123	139	158	158	205	205	250	250	263	263
54	Egypt	Birqash	Sudany	117	121	107	119	148	150	161	161	240	242	293	317	105	107	107	107	148	174	207	207	235	235	252	262	277	283	90	94	139	139	158	158	205	207	248	248	263	263
55	Egypt	Birqash	Sudany	107	117	107	107	150	150	157	157	236	240	303	317	105	107	107	107	174	180	207	207	231	231	250	262	277	285	94	94	?	?	164	164	?	?	252	252	261	263
56	Egypt	Birqash	Sudany	121	121	107	119	148	168	161	161	240	242	317	321	103	109	105	107	172	182	207	209	231	239	260	260	277	281	90	98	139	139	158	158	195	197	238	252	263	263
57	Egypt	Birqash	Sudany	107	117	107	119	146	150	161	161	238	240	305	307	103	103	105	107	180	182	207	207	245	245	266	266	285	285	94	94	?	?	158	164	205	205	250	250	261	263
58	Egypt	Birqash	Sudany	107	117	107	119	148	150	161	161	236	240	295	295	109	111	105	107	148	188	207	207	231	235	252	262	277	281	94	100	139	139	158	160	197	205	250	252	261	263
59	Egypt	Birqash	Sudany	107	117	107	107	150	150	157	157	236	240	303	317	105	107	105	107	174	180	207	207	231	231	250	262	277	285	94	94	137	139	158	158	205	205	238	252	261	263
60	Egypt	Birqash	Sudany	107	121	107	107	150	152	159	161	238	242	299	317	103	103	107	107	148	182	207	207	231	241	260	266	277	285	90	94	123	141	158	164	197	205	238	252	261	261
61	Egypt	Birqash	Sudany	107	107	107	107	148	148	161	161	238	242	293	317	109	111	107	107	148	154	207	209	231	235	250	266	283	295	90	94	135	135	158	164	199	199	252	252	261	263
62	Egypt	Birqash	Sudany	107	121	107	127	146	146	159	161	242	242	285	299	103	105	107	107	148	186	207	207	231	231	260	262	277	283	94	94	135	141	158	158	205	205	248	250	263	263
63	Egypt	Birqash	Sudany	117	117	107	119	148	148	159	161	236	238	313	317	103	109	107	107	174	174	207	207	235	243	260	266	281	281	94	94	141	141	158	164	205	205	248	248	263	263
64	Egypt	Birqash	Sudany	115	115	119	119	148	150	161	161	242	242	285	307	103	109	105	107	174	180	207	207	235	235	252	252	277	297	90	94	?	?	158	164	197	205	252	254	261	263
65	Egypt	Birqash	Sudany	117	121	113	119	148	150	161	161	238	242	?	?	103	107	105	105	172	178	207	209	231	243	250	250	283	283	94	94	141	141	158	158	205	205	252	254	261	261
66	Egypt	Birqash	Sudany	117	117	107	117	148	150	159	161	240	242	285	317	103	107	107	107	148	188	207	209	235	235	260	260	285	285	90	94	139	139	158	160	191	205	242	252	261	263
67	Egypt	Birqash	Sudany	107	121	107	119	146	150	161	161	240	242	317	325	103	107	107	107	148	174	207	209	235	245	252	262	281	293	90	94	123	143	166	166	197	207	248	252	263	263
68	Egypt	Birqash	Sudany	107	117	107	119	150	164	159	161	238	240	285	309	103	107	105	105	174	180	207	209	231	239	254	260	277	283	90	98	139	141	166	166	205	205	238	250	263	263
69	Egypt	Birqash	Sudany	107	117	107	107	148	148	161	161	240	242	313	317	105	107	105	107	148	172	207	207	231	245	252	262	281	303	90	94	123	141	158	158	205	205	252	252	261	263
70	Egypt	Birqash	Sudany	117	117	107	107	148	148	159	161	240	242	285	317	103	107	107	107	148	188	207	209	235	235	260	260	285	285	90	94	139	139	158	160	191	205	244	254	261	263
71	Egypt	Mersa Matrouh	ND	107	117	107	117	146	168	161	161	238	242	317	317	105	107	105	107	172	182	209	209	231	245	252	260	281	301	90	90	139	141	158	164	205	205	250	252	263	263
72	Egypt	Mersa Matrouh	ND	117	117	107	119	146	168	161	161	238	242	317	317	103	105	105	105	180	182	207	209	231	245	252	260	277	285	94	94	123	137	158	158	205	205	252	252	263	263
73	Egypt	Mersa Matrouh	ND	117	121	103	119	148	168	161	161	240	240	285	299	105	107	105	107	174	182	207	207	231	231	254	264	277	277	100	100	135	141	158	158	205	205	250	252	263	263
74	Egypt	Mersa Matrouh	ND	117	117	107	119	148	152	161	161	240	242	285	309	103	105	105	107	180	180	207	209	231	235	260	262	277	277	90	94	123	139	158	164	205	205	238	252	261	263
75	Egypt	Mersa Matrouh	ND	117	121	113	119	150	168	161	161	238	240	299	317	101	103	105	107	172	182	207	207	235	235	252	254	281	297	90	94	123	139	158	158	201	205	254	254	261	263
76	Egypt	Mersa Matrouh	ND	117	117	107	119	150	168	159	161	238	240	295	317	103	103	105	105	172	172	207	207	231	235	260	266	273	273	90	94	139	139	158	164	201	205	250	252	263	263
77	Egypt	Mersa Matrouh	ND	107	117	107	119	148	168	159	161	240	240	307	317	103	103	107	107	184	184	207	207	235	245	260	262	277	285	90	94	137	139	158	158	205	207	246	248	263	263
78	Egypt	Mersa Matrouh	ND	121	121	119	119	150	162	161	161	240	242	285	317	105	105	105	107	180	188	207	207	231	231	252	254	277	281	90	94	117	139	158	158	197	197	252	254	263	263
79	Egypt	Mersa Matrouh	ND	117	121	119	119	148	148	161	161	240	244	285	317	105	113	105	105	182	184	207	209	231	235	260	260	277	297	90	94	117	139	158	164	197	207	242	252	263	263
80	Egypt	Mersa Matrouh	ND	107	121	117	119	150	162	161	161	240	242	307	317	103	105	105	107	148	180	207	207	231	245	260	260	281	299	90	94	123	137	158	164	197	205	250	252	261	263
81	Egypt	Mersa Matrouh	ND	117	117	107	119	148	162	159	161	236	242	303	307	103	111	105	107	174	182	207	209	235	245	260	262	281	285	90	94	123	141	158	158	207	207	252	254	263	263
82	Egypt	Mersa Matrouh	ND	107	121	119	127	148	150	161	161	238	240	297	317	103	105	105	105	148	148	207	207	245	249	252	260	277	281	94	94	123	141	158	164	197	207	238	250	263	263
83	Egypt	Mersa Matrouh	ND	107	107	107	117	146	148	161	161	240	242	295	297	101	103	105	105	148	184	207	207	245	249	252	260	277	281	90	94	117	141	158	158	199	199	238	242	263	263
84	Egypt	Mersa Matrouh	ND	107	107	107	119	148	168	159	161	238	242	285	317	103	105	105	107	180	184	207	209	231	231	260	260	277	281	90	94	137	139	158	158	197	205	238	252	261	263
85	Egypt	Mersa Matrouh	ND	107	117	117	119	150	150	161	161	236	240	315	317	103	107	105	105	174	182	207	207	231	243	254	260	277	287	90	94	123	139	158	164	205	205	248	252	261	263
86	Egypt	Mersa Matrouh	ND	121	123	113	119	148	148	161	161	236	240	285	311	103	107	105	105	148	174	207	209	235	245	252	262	281	285	94	94	123	139	158	164	205	205	250	252	261	263
87	Egypt	Sedi-Barrany	ND	117	121	119	119	150	168	161	161	240	242	299	317	103	107	105	105	172	186	207	209	231	231	252	260	277	277	94	100	135	137	158	158	205	207	250	250	261	263
88	Egypt	Sedi-Barrany	ND	107	117	117	119	150	160	161	161	238	240	317	319	103	107	105	105	148	184	207	209	235	235	236	254	281	285	90	94	139	139	158	158	205	207	248	250	263	263
89	Egypt	Sedi-Barrany	ND	121	121	119	119	148	150	161	161	236	242	303	317	105	107	105	111	148	148	207	209	235	239	260	260	279	281	94	94	139	139	158	158	197	205	252	252	263	263
90	Egypt	Sedi-Barrany	ND	117	121	119	119	148	168	161	161	240	242	317	331	103	105	105	105	182	188	207	207	235	245	252	260	273	277	90	94	137	139	158	158	205	207	252	252	263	263
91	Egypt	Sedi-Barrany	ND	107	117	107	113	150	160	161	161	240	242	291	295	103	103	105	105	148	182	207	209	243	245	254	262	281	293	90	94	139	145	158	158	205	207	250	250	263	263
92	Egypt	Sedi-Barrany	ND	107	121	107	119	148	168	161	161	238	240	295	303	105	107	105	107	172	182	207	209	231	245	254	266	281	295	90	90	123	123	158	158	205	205	252	264	261	263
93	Egypt	Sedi-Barrany	ND	107	117	119	119	150	150	161	161	236	238	317	317	103	105	105	107	148	180	207	209	231	243	254	260	281	285	90	98	137	139	158	158	205	205	248	252	261	261
94	Egypt	Sedi-Barrany	ND	107	121	119	119	148	168	161	161	240	240	285	317	105	107	107	107	172	180	207	207	239	243	260	260	281	285	90	94	135	137	158	158	205	207	242	252	263	263
95	Egypt	Sedi-Barrany	ND	107	117	119	119	148	148	161	161	242	244	295	317	103	105	105	107	180	188	207	207	235	235	252	254	277	277	94	94	137	141	158	164	205	205	252	252	261	263
96	Egypt	Sedi-Barrany	ND	107	117	107	117	148	168	161	161	240	242	299	317	101	103	105	107	148	174	207	207	245	245	254	262	277	285	90	90	137	141	158	164	205	205	242	252	263	263
97	Egypt	Sedi-Barrany	ND	107	117	107	119	148	162	161	161	240	242	285	297	103	107	107	107	172	182	207	209	245	245	258	262	275	277	90	90	117	123	158	164	205	207	238	248	263	263
98	Egypt	Sedi-Barrany	ND	107	107	119	119	150	160	161	161	236	238	295	319	103	107	105	105	148	174	207	209	231	245	254	260	277	303	90	94	139	139	158	158	205	207	250	252	263	263
99	Egypt	Sedi-Barrany	ND	117	117	113	119	146	162	161	161	236	240	307	317	103	107	105	105	148	182	207	207	231	245	260	260	281	285	94	94	139	141	158	158	205	205	252	254	263	263
100	Egypt	Sedi-Barrany	ND	117	117	107	121	150	162	161	161	240	242	317	317	103	109	105	107	184	188	207	209	237	245	260	260	281	301	90	94	123	145	158	164	197	207	250	250	263	263
101	Egypt	Sedi-Barrany	ND	107	117	113	119	150	168	161	161	240	242	295	299	103	107	105	105	148	174	207	209	233	235	260	264	281	281	90	94	123	139	158	158	191	197	250	252	261	263
102	Egypt	Sedi-Barrany	ND	107	121	107	119	150	150	159	161	238	240	295	317	103	103	105	107	172	180	207	207	231	231	260	266	277	285	94	94	137	141	158	164	197	205	252	254	263	263
103	Egypt	Sedi-Barrany	ND	107	117	107	119	150	168	159	161	236	242	299	317	103	103	107	107	180	182	209	209	231	235	254	260	277	277	94	100	123	139	158	164	197	207	250	250	263	263
104	Egypt	Sedi-Barrany	ND	121	121	105	107	150	162	161	161	238	242	317	317	105	107	105	107	148	188	207	207	239	245	252	260	273	281	90	90	123	145	158	158	205	205	242	250	263	263
105	Egypt	Sedi-Barrany	ND	117	117	107	119	150	150	161	161	236	238	285	317	105	107	107	107	148	148	207	209	231	239	254	260	281	281	94	94	133	139	158	164	205	207	250	252	263	263
106	Egypt	Sedi-Barrany	ND	107	117	107	113	150	150	161	161	238	240	285	313	103	103	105	107	148	180	207	207	231	235	262	268	281	281	90	94	135	139	158	158	205	207	248	250	261	263
107	Egypt	Sedi-Barrany	ND	117	117	117	119	146	162	157	161	238	240	285	303	?	?	?	?	148	174	209	209	231	235	254	262	277	285	90	94	139	141	158	164	205	205	252	254	263	263
108	Egypt	Sedi-Barrany	ND	117	123	113	119	148	150	159	161	238	242	317	317	103	103	105	107	148	188	207	207	231	235	260	260	281	285	90	94	117	135	164	164	205	207	254	254	263	263
109	Egypt	Sedi-Barrany	ND	117	117	107	107	148	168	155	161	240	240	291	291	103	105	105	107	148	172	207	207	235	245	254	262	279	281	90	90	123	139	158	158	205	207	240	250	261	263
110	Egypt	Sedi-Barrany	ND	117	121	107	119	146	150	161	161	240	242	307	315	103	103	107	107	174	182	207	209	235	245	254	260	281	285	90	94	139	141	158	158	205	207	250	252	263	263
111	Egypt	Negeila	ND	107	117	119	119	150	164	155	157	240	240	295	317	111	113	107	107	182	188	207	207	231	245	260	262	285	297	90	94	139	141	158	158	205	207	250	252	263	263
112	Egypt	Negeila	ND	107	117	119	119	150	166	159	161	240	242	297	317	103	105	105	107	180	184	207	207	231	231	260	262	277	303	90	90	123	141	158	164	205	205	252	252	263	263
113	Egypt	Negeila	ND	117	121	107	117	150	168	157	161	236	242	295	317	103	107	109	109	172	174	207	207	231	235	260	260	277	293	94	94	123	139	158	164	197	207	250	252	261	263
114	Egypt	Negeila	ND	107	117	107	119	150	150	161	161	240	244	285	317	103	103	105	105	172	180	207	207	235	245	260	266	281	305	90	90	123	141	158	164	197	205	252	254	263	263
115	Egypt	Negeila	ND	117	125	119	119	150	150	161	161	240	242	299	317	107	111	105	107	180	182	207	207	245	245	254	260	277	301	90	94	117	143	158	158	205	205	238	252	263	263
116	Egypt	Negeila	ND	?	?	119	119	148	150	161	161	242	242	285	299	103	107	107	107	148	186	207	209	235	239	252	260	281	281	94	94	117	123	158	158	205	207	250	250	263	263
117	Egypt	Negeila	ND	121	125	119	123	148	150	161	161	240	240	?	?	103	107	105	105	180	180	207	209	231	235	252	260	275	283	94	98	123	137	158	158	205	205	250	252	261	263
118	Egypt	Negeila	ND	107	107	107	113	148	150	161	161	236	240	?	?	101	103	105	107	148	182	207	207	231	243	260	266	283	283	94	94	117	123	158	160	205	205	252	254	263	263
119	Egypt	Negeila	ND	117	117	107	119	150	168	159	161	240	242	317	317	101	103	107	107	172	172	207	209	231	231	260	266	273	293	90	90	123	139	158	158	205	205	254	254	263	263
120	Egypt	Negeila	ND	107	117	117	119	150	150	161	161	238	242	285	323	103	111	105	107	172	182	207	207	231	231	260	266	275	281	90	90	123	123	158	158	205	207	248	250	261	263
121	Egypt	Negeila	ND	117	121	119	119	148	152	157	161	236	242	291	319	103	105	105	107	182	182	209	209	231	245	260	262	283	303	90	94	139	141	158	164	205	205	250	252	261	263
122	Egypt	Negeila	ND	117	117	117	119	148	150	159	159	236	238	295	307	103	105	105	105	148	172	209	209	231	245	252	252	283	283	90	94	139	141	158	158	205	205	252	254	261	263
123	Egypt	Negeila	ND	107	121	117	119	148	150	157	161	236	242	285	319	105	105	107	107	148	182	209	209	231	231	260	266	277	301	90	94	141	141	158	160	205	207	250	252	261	263
124	Egypt	Negeila	ND	117	119	117	119	146	148	157	161	238	240	295	317	105	107	105	107	148	148	209	209	235	245	254	260	283	295	94	94	137	141	158	158	199	199	250	252	261	261
125	Egypt	Negeila	ND	117	117	107	119	148	168	161	161	232	236	?	?	105	105	107	107	148	172	207	209	245	245	254	260	283	283	94	94	141	141	158	160	205	207	252	254	261	263
126	Egypt	Negeila	ND	107	121	119	119	148	150	161	161	240	242	285	307	105	107	105	107	148	180	207	207	231	241	252	254	277	285	90	94	117	141	158	158	207	207	242	252	263	263
127	Egypt	Negeila	ND	107	117	107	119	150	168	161	161	238	242	317	317	105	107	107	107	148	148	207	207	231	245	252	266	275	281	90	94	117	139	158	158	207	207	248	252	261	263
128	Egypt	Negeila	ND	107	107	107	119	152	162	161	161	240	242	307	317	103	103	107	107	180	182	207	207	235	235	260	262	277	281	90	94	123	123	158	164	205	207	238	250	261	261
129	Egypt	Negeila	ND	107	117	107	107	148	150	161	161	238	242	285	323	103	107	105	107	148	174	207	209	235	245	254	266	281	281	90	90	123	141	164	164	205	205	250	252	263	263
130	Egypt	Negeila	ND	107	117	117	119	152	164	161	161	236	242	305	319	103	107	105	107	148	186	207	209	231	235	254	260	277	281	94	94	135	139	158	164	205	207	250	252	263	263
131	Egypt	Negeila	ND	107	117	107	119	148	150	161	161	242	242	317	317	101	103	107	107	148	172	207	207	235	241	260	262	273	285	94	94	123	141	158	164	207	207	250	252	261	261
132	Egypt	Negeila	ND	107	121	119	127	148	170	161	161	240	242	295	317	103	103	107	107	180	180	207	207	231	231	260	266	277	281	90	94	139	141	158	164	197	207	254	254	263	263
133	Egypt	Negeila	ND	107	107	113	119	150	162	157	161	238	238	295	317	103	105	107	107	174	186	207	207	231	231	262	262	281	303	90	90	137	139	158	164	207	207	248	250	261	261
134	Algeria	Bechar	Rguibi	107	107	119	119	148	152	161	161	242	242	285	317	103	107	107	107	174	182	207	209	245	245	260	260	277	281	090	090	135	139	158	164	197	207	238	250	263	263
135	Algeria	Bechar	Rguibi	117	121	117	119	148	168	161	161	238	240	285	285	103	103	105	105	182	184	207	209	231	245	252	256	277	285	094	100	123	139	158	164	207	207	252	252	263	263
136	Algeria	Bechar	Rguibi	117	117	107	119	148	168	159	161	240	242	285	285	103	103	107	107	188	190	207	207	231	235	252	260	281	295	090	090	135	141	158	158	205	205	242	252	263	263
137	Algeria	Bechar	Rguibi	117	117	119	119	148	168	157	161	236	236	317	317	103	107	105	105	180	182	207	209	233	247	262	262	281	281	090	090	123	139	158	158	197	205	250	252	263	263
138	Algeria	Bechar	Rguibi	107	117	117	119	148	148	161	161	238	238	315	315	103	103	107	107	172	180	207	207	233	243	254	262	281	281	090	090	141	141	158	164	205	205	248	254	263	263
139	Algeria	Bechar	Rguibi	107	117	107	107	150	168	161	161	240	240	285	321	103	105	107	107	148	188	207	207	233	233	254	264	285	299	090	090	137	139	158	164	205	205	238	252	261	263
140	Algeria	Bechar	Rguibi	107	107	107	107	148	150	161	161	238	242	285	285	103	105	105	107	148	182	207	207	233	245	252	260	281	297	094	100	117	139	158	160	207	207	250	252	263	263
141	Algeria	Bechar	Rguibi	107	107	107	107	148	150	161	161	240	242	285	311	103	103	105	107	174	182	207	207	231	243	252	260	281	297	090	100	139	141	158	160	207	207	248	250	263	263
142	Algeria	Bechar	Rguibi	107	119	119	119	150	168	157	161	236	240	285	285	103	103	105	107	148	174	207	207	231	239	260	260	277	285	094	100	139	139	158	158	207	207	248	252	263	263
143	Algeria	Bechar	Rguibi	117	121	119	119	148	150	159	161	236	244	285	285	103	103	105	107	148	190	207	207	231	243	262	262	277	281	090	094	117	137	158	158	197	197	250	250	261	263
144	Algeria	Bechar	Azawad	107	117	119	119	148	148	161	161	236	240	311	317	103	107	105	107	172	180	207	207	237	243	254	262	297	297	090	94	139	143	158	158	207	207	248	250	263	263
145	Algeria	Bechar	Azawad	121	121	119	127	150	150	159	161	238	238	287	311	103	103	105	105	174	182	207	209	?	?	254	260	277	281	090	094	123	139	158	158	205	205	248	250	263	263
146	Algeria	Bechar	Azawad	117	121	107	119	148	168	161	161	240	240	285	293	087	103	107	107	148	184	207	209	237	245	254	260	277	285	094	094	123	141	158	158	197	207	242	250	261	263
147	Algeria	Bechar	Azawad	107	117	109	109	148	150	161	161	240	242	285	317	103	107	105	107	148	148	209	209	233	233	260	260	277	277	094	098	123	139	158	164	207	207	250	250	263	263
148	Algeria	Bechar	Azawad	121	121	107	107	148	148	157	161	240	240	295	325	103	103	105	107	182	192	209	209	231	235	252	260	281	283	098	100	139	139	158	158	205	205	250	252	?	?
149	Algeria	Bechar	Rguibi	107	107	107	117	148	150	157	161	240	240	285	313	103	103	105	107	180	182	207	207	?	?	252	260	277	283	090	090	137	139	160	164	205	205	250	252	263	263
150	Algeria	Bechar	Rguibi	117	121	117	127	148	150	161	161	238	240	295	313	103	103	105	107	174	182	207	209	245	245	?	?	277	281	090	094	139	141	158	158	205	205	248	252	261	263
151	Algeria	Bechar	Azawad	117	121	107	119	148	148	159	159	238	240	287	325	103	103	105	107	148	184	207	207	233	247	?	?	277	281	094	094	137	139	158	164	205	205	250	252	261	263
152	Algeria	Bechar	Azawad	117	117	119	127	150	150	161	161	240	240	317	317	103	105	105	107	182	184	207	207	?	?	262	262	277	285	094	094	123	139	158	158	205	205	248	252	263	263
153	Algeria	Bechar	ND	117	117	107	121	168	170	161	161	240	242	317	317	103	103	107	107	148	182	207	209	233	233	262	266	273	297	090	090	123	139	160	164	207	207	?	?	261	263
154	Algeria	Bechar	Rguibi	117	117	107	119	150	150	161	161	240	240	295	317	103	105	105	105	148	178	207	209	233	243	?	?	273	285	094	094	123	135	158	164	197	205	250	252	263	263
155	Algeria	Bechar	Rguibi	107	117	107	107	150	168	161	161	240	242	285	317	103	107	107	107	180	182	207	207	233	247	262	264	281	285	094	094	123	139	158	164	197	205	242	252	261	263
156	Algeria	Steppe	ND	107	121	113	119	164	164	159	161	240	242	285	319	103	105	107	107	182	188	207	209	237	237	262	268	277	287	094	094	139	139	158	164	197	207	252	252	263	263
157	Algeria	Steppe	ND	121	121	107	107	146	152	161	161	238	242	313	317	103	105	105	107	148	178	207	207	231	235	260	266	277	299	094	094	117	123	158	158	197	205	244	252	263	263
158	Algeria	Steppe	ND	117	117	107	107	154	168	161	161	240	242	285	307	103	105	107	107	182	188	207	207	231	237	254	262	277	287	094	094	117	137	158	158	197	205	250	252	263	263
159	Algeria	Steppe	Rguibi	107	117	119	127	148	168	161	161	236	238	285	295	103	105	107	107	182	184	207	209	231	245	260	262	281	295	090	094	139	139	158	166	197	205	252	252	263	263
160	Algeria	Steppe	ND	107	117	119	127	148	168	161	161	236	238	285	295	105	105	105	107	180	182	207	209	233	247	252	264	277	285	090	094	137	145	158	166	197	205	250	252	263	263
161	Algeria	Steppe	Rguibi	107	117	107	107	148	164	157	161	236	240	285	317	103	103	105	107	148	182	207	209	233	233	252	268	277	297	094	098	139	141	158	166	205	205	248	252	263	263
162	Algeria	Steppe	Rguibi	117	121	107	119	150	150	161	161	240	242	285	311	103	103	107	107	180	188	207	207	233	233	262	264	285	297	098	098	123	139	158	164	197	205	238	252	263	263
163	Algeria	Steppe	Rguibi	107	107	107	107	148	150	157	161	242	242	293	295	087	105	107	107	172	174	207	209	233	233	252	262	281	295	094	094	137	139	158	158	205	205	252	252	261	263
164	Algeria	Steppe	Azawad	107	121	107	119	150	168	161	161	240	242	293	321	105	105	105	107	148	148	207	207	233	233	262	268	281	297	090	090	117	141	158	158	197	205	252	252	263	263
165	Algeria	Steppe	Azawad	107	107	103	119	162	164	161	161	240	240	297	311	103	103	105	107	148	182	207	209	233	245	254	264	277	297	090	094	117	139	158	160	197	205	250	252	263	263
166	Algeria	Steppe	Rguibi	107	117	107	119	148	162	161	161	240	242	285	317	103	103	105	107	180	190	207	207	233	243	262	262	281	297	090	100	123	141	158	158	205	207	238	252	263	263
167	Algeria	Steppe	ND	117	121	107	119	148	150	161	161	240	240	311	317	103	103	107	107	148	180	207	207	233	237	252	252	285	287	090	098	123	139	158	164	205	205	250	250	263	263
168	Algeria	Steppe	Rguibi	107	117	119	119	148	150	157	159	238	240	297	299	103	103	105	105	172	174	207	207	233	233	252	254	277	285	094	100	123	137	158	158	197	205	246	248	263	263
169	Algeria	Steppe	Rguibi	117	117	113	119	148	152	159	161	238	242	317	317	107	111	107	107	172	182	207	207	245	245	252	254	277	281	090	094	139	139	158	158	205	207	248	250	263	263
170	Algeria	Steppe	ND	107	117	107	119	148	160	157	159	238	238	311	317	103	103	105	105	148	182	207	207	233	233	254	262	285	285	090	094	123	137	158	158	191	205	238	252	263	263
171	Algeria	Steppe	ND	117	121	119	119	150	150	157	161	242	242	285	301	103	107	105	107	172	174	207	209	233	237	252	268	297	307	090	094	123	141	158	164	191	205	238	252	263	263
172	Algeria	Steppe	Azawad	107	117	119	119	148	148	161	161	238	240	285	317	103	103	107	107	174	182	207	207	231	237	260	260	277	285	090	090	123	139	164	164	197	205	238	242	263	263
173	Algeria	Steppe	ND	117	121	109	113	150	164	161	161	240	242	297	317	103	103	105	107	148	190	207	209	233	237	252	252	277	295	094	098	123	139	158	158	205	205	248	252	261	261
174	Algeria	Steppe	ND	107	117	107	107	150	168	157	161	236	242	317	319	103	103	107	107	180	182	207	207	237	239	260	260	281	281	094	094	123	141	158	158	197	207	252	252	263	263
175	Algeria	Steppe	ND	107	117	107	119	148	148	161	161	238	240	285	309	103	103	107	107	188	190	207	207	233	237	262	262	277	281	090	100	123	139	158	158	205	207	248	250	263	263
176	Algeria	Steppe	Rguibi	117	117	113	127	148	150	157	161	240	242	285	323	087	107	105	107	172	182	207	209	233	233	260	260	281	287	090	090	123	139	158	166	197	205	238	250	261	263
177	Algeria	Steppe	ND	117	121	119	119	148	150	161	161	240	242	311	317	103	103	105	105	174	182	207	209	231	231	252	260	285	285	090	090	123	141	158	164	197	205	238	250	261	263
178	Algeria	Steppe	Rguibi	107	117	107	117	150	150	159	159	242	242	289	317	103	103	105	107	186	188	207	207	231	231	252	264	277	281	094	098	139	141	158	158	197	205	238	252	263	263
179	Algeria	Steppe	ND	107	117	117	119	148	150	157	157	240	242	309	309	103	103	105	107	148	182	207	207	231	231	254	262	297	297	090	094	137	139	158	158	205	205	252	252	263	263
180	Algeria	Tindouf	Rguibi	107	121	107	119	148	150	161	161	242	242	299	313	103	103	105	107	174	184	207	207	237	247	254	262	285	297	090	098	117	139	158	158	197	207	252	252	263	263
181	Algeria	Tindouf	Rguibi	107	117	119	123	148	150	159	161	240	242	315	317	103	103	105	105	148	182	207	207	231	245	254	260	281	285	090	090	123	139	158	158	205	207	248	250	263	263
182	Algeria	Tindouf	Rguibi	107	117	107	119	148	150	157	161	240	240	285	317	103	105	105	105	148	182	207	207	231	245	260	260	277	285	090	090	135	143	158	160	205	207	238	252	261	263
183	Algeria	Tindouf	Rguibi	107	117	119	119	150	162	161	161	240	242	295	311	103	103	105	105	182	182	209	209	233	233	262	262	281	297	090	100	143	145	158	158	197	197	252	252	261	263
184	Algeria	Tindouf	Rguibi	117	121	107	107	148	150	161	161	?	?	285	317	103	103	105	105	182	182	207	209	231	245	252	262	281	285	090	094	123	139	158	164	205	205	248	248	263	263
185	Algeria	Tindouf	Rguibi	107	107	107	107	148	152	161	161	242	244	285	323	103	107	105	107	182	182	207	209	245	245	260	260	277	281	090	094	137	139	158	158	197	197	232	252	263	263
186	Algeria	Tindouf	Rguibi	107	107	107	107	152	160	161	161	240	242	285	317	103	107	105	107	172	182	207	207	231	231	254	260	273	293	090	094	123	139	158	158	197	205	252	252	263	263
187	Algeria	Tindouf	Rguibi	107	117	107	113	148	164	161	161	224	242	305	313	103	103	107	107	180	182	209	209	231	231	252	262	277	285	094	094	139	139	158	158	205	205	250	250	263	263
188	Algeria	Tindouf	Rguibi	107	117	107	113	148	164	161	161	224	242	305	313	103	105	105	107	148	182	207	207	235	245	260	262	281	285	094	100	139	141	158	164	197	207	252	254	263	263
189	Algeria	Tindouf	Rguibi	107	107	107	113	150	150	157	157	236	236	317	317	103	105	105	105	180	182	207	207	231	235	254	262	277	285	094	100	139	141	158	158	197	205	238	238	263	263
190	Algeria	Tindouf	Rguibi	107	107	107	119	148	148	159	161	238	242	317	317	103	103	105	107	172	174	207	209	231	231	252	252	285	297	094	094	139	145	158	158	205	205	250	252	261	263
191	Algeria	Tindouf	Rguibi	107	117	107	107	148	148	161	161	238	240	313	317	103	105	105	107	170	184	207	209	231	235	260	262	277	295	090	094	123	139	158	158	205	205	248	248	263	263
192	Algeria	Tindouf	Rguibi	107	107	107	119	148	150	159	161	238	242	285	309	103	103	105	107	172	180	207	209	231	245	260	266	277	297	094	098	117	123	158	158	197	205	248	252	263	263
193	Algeria	Tindouf	Rguibi	107	117	107	107	148	150	161	161	240	240	285	317	103	105	107	107	148	188	207	209	231	231	260	264	297	299	090	090	139	139	158	164	205	205	238	252	263	263
194	Algeria	Tindouf	Rguibi	107	121	107	119	148	150	161	161	240	242	285	329	103	103	105	107	172	182	207	207	231	231	254	262	281	297	094	098	123	139	158	164	197	207	248	248	263	263
195	Algeria	Tindouf	Rguibi	107	121	119	127	148	148	159	161	236	242	285	285	103	107	107	107	182	182	207	207	235	245	260	260	277	277	090	098	123	125	158	164	207	207	252	252	263	263
196	Algeria	Tindouf	Azawad	117	117	119	119	148	150	161	161	242	242	311	317	103	103	105	107	182	182	207	209	235	245	252	260	285	285	094	100	139	143	158	158	197	205	248	250	261	261
197	Algeria	Tindouf	Azawad	117	117	107	119	150	150	161	161	238	242	285	315	103	107	105	105	174	184	207	207	231	241	260	266	277	277	090	100	123	123	158	158	197	205	250	252	261	263
198	Algeria	Tindouf	Rguibi	107	107	107	107	148	150	161	161	238	242	305	317	103	105	107	107	180	184	209	209	231	231	266	266	277	285	090	094	135	141	158	158	205	205	242	250	263	263
199	Algeria	Tindouf	Rguibi	107	117	119	119	150	150	161	161	240	242	301	307	103	103	105	107	180	182	207	207	235	245	254	260	281	285	094	100	139	141	158	158	205	205	250	252	261	263
200	Algeria	Tindouf	Rguibi	107	121	119	119	148	168	161	161	240	244	309	317	103	107	105	107	148	148	207	207	231	243	252	260	277	281	094	100	117	139	158	158	197	205	250	252	263	263
201	Algeria	Tindouf	Rguibi	107	117	107	119	148	168	157	161	238	244	307	317	103	103	107	107	148	172	207	207	231	237	254	260	277	281	094	094	123	141	158	158	207	207	252	252	263	263
202	Algeria	Tindouf	Rguibi	121	121	107	107	148	148	157	161	240	240	295	325	103	103	105	107	182	192	209	209	231	237	252	260	281	285	098	100	137	139	158	158	205	205	250	252	261	263
203	Algeria	Tindouf	Rguibi	107	117	107	113	148	150	161	161	236	240	295	317	103	107	107	107	172	188	207	209	237	245	252	260	299	299	090	100	139	139	158	158	207	207	248	252	263	263
204	Algeria	Tindouf	Rguibi	107	117	107	117	148	150	161	161	242	242	295	317	103	103	105	107	182	184	207	207	237	243	260	262	281	281	090	094	139	139	158	164	205	207	250	250	261	263
205	Algeria	Tindouf	Rguibi	107	107	107	107	148	150	161	161	238	240	285	301	111	111	107	107	148	182	207	209	245	245	252	268	281	299	090	094	117	123	158	158	205	207	242	252	263	263
206	Algeria	Tindouf	Rguibi	107	117	107	117	150	150	161	161	238	242	295	307	103	105	105	105	172	182	207	207	237	245	262	262	277	285	094	094	123	139	158	158	197	205	252	252	263	263
207	Algeria	Tindouf	Rguibi	117	117	119	119	160	160	157	161	236	242	285	295	105	105	107	107	180	182	207	209	245	245	260	260	285	299	098	098	123	137	158	158	205	205	250	252	263	263
208	Algeria	Tindouf	Rguibi	117	117	111	119	150	150	161	161	238	242	285	285	103	105	107	107	172	174	207	207	233	233	254	264	285	293	094	094	139	141	158	158	197	207	252	252	263	263
209	Algeria	Tindouf	Rguibi	107	121	119	119	148	152	161	161	236	240	315	317	103	105	105	107	180	182	207	209	233	233	262	268	273	285	090	090	117	137	158	158	205	207	250	254	263	263
210	Algeria	Tindouf	Rguibi	107	121	119	119	148	152	161	161	236	240	315	317	103	105	105	107	180	182	207	209	231	231	260	266	273	285	090	090	117	137	158	158	205	207	250	254	263	263
211	Algeria	Tindouf	Rguibi	107	117	117	119	148	148	161	161	240	242	309	329	103	105	105	107	180	180	207	207	231	231	250	260	273	277	090	094	137	139	158	164	197	205	252	254	263	263
212	Algeria	Tindouf	Rguibi	107	121	119	119	148	168	161	161	238	240	285	313	105	107	107	107	182	182	207	209	233	237	252	262	277	277	090	094	139	141	158	164	197	207	250	254	263	263
213	Algeria	Tindouf	Rguibi	117	117	119	119	164	168	159	161	238	240	285	317	103	103	105	107	148	182	207	209	241	247	262	262	275	285	094	098	139	139	158	160	205	207	240	252	261	263
214	Algeria	ADRAR	Rguibi	117	119	119	119	148	148	161	161	238	242	293	297	105	105	105	105	180	188	207	209	237	245	254	260	285	285	094	094	123	123	158	164	205	207	252	254	263	263
215	Algeria	ADRAR	Azawad	107	107	119	119	148	148	157	161	236	242	317	317	103	107	105	105	182	188	207	207	233	233	260	262	273	277	090	098	137	137	158	158	207	207	252	254	263	263
216	Algeria	ADRAR	Azawad	107	121	107	107	150	150	157	161	238	242	297	323	103	107	107	107	172	188	207	207	?	?	?	?	285	297	094	100	139	139	158	158	197	197	250	252	263	263
217	Algeria	ADRAR	Azawad	107	117	107	117	148	168	161	161	240	242	299	309	103	103	105	107	182	188	207	207	247	247	262	262	277	297	090	100	123	123	158	164	205	205	254	254	263	263
218	Algeria	ADRAR	Azawad	107	117	117	117	150	150	161	161	240	242	319	319	103	105	107	107	148	182	207	207	233	247	254	254	281	281	090	094	139	141	158	164	205	205	240	254	263	263
219	Algeria	ADRAR	Azawad	121	121	107	119	168	172	157	159	238	240	285	309	105	107	105	105	182	182	207	207	233	247	252	262	277	281	094	100	137	139	158	158	197	205	252	254	263	263
220	Algeria	ADRAR	Azawad	117	117	107	107	148	152	157	161	238	240	285	317	103	103	105	107	182	184	209	209	233	245	252	264	273	301	090	090	139	139	158	158	205	205	250	254	261	263
221	Algeria	ADRAR	Azawad	107	117	107	107	150	150	159	161	242	242	285	293	103	103	105	107	174	188	207	207	237	247	254	262	285	297	090	094	123	137	158	158	205	207	250	250	261	261
222	Algeria	ADRAR	Azawad	117	121	113	117	150	150	161	161	238	238	285	295	103	103	105	107	182	188	207	209	237	245	252	252	281	303	094	098	137	143	158	164	205	205	250	250	263	263
223	Algeria	ADRAR	Azawad	107	121	107	119	150	168	157	161	240	242	317	325	103	105	105	107	148	182	207	207	233	247	254	264	297	297	090	094	117	145	158	164	205	207	250	254	263	263
224	Algeria	ADRAR	Azawad	117	117	107	119	148	150	159	161	240	242	287	317	87	103	105	107	184	186	207	207	235	245	260	260	281	283	090	094	123	137	158	158	197	197	244	250	263	263
225	Algeria	ADRAR	Azawad	117	121	107	127	150	168	159	161	240	242	315	317	103	103	105	107	182	184	207	207	233	247	254	262	277	297	094	100	137	139	158	158	197	205	250	254	263	263
226	Algeria	ADRAR	Azawad	107	117	107	117	162	168	157	161	240	240	317	317	105	107	107	107	182	182	207	207	247	247	254	262	277	277	094	094	123	139	158	158	207	207	252	252	263	263
227	Algeria	ADRAR	Azawad	121	121	107	117	148	150	161	161	238	242	317	317	103	105	105	107	182	190	207	207	233	233	262	262	277	305	094	100	139	139	158	164	205	207	254	254	261	261
228	Algeria	ADRAR	Azawad	107	121	107	107	150	168	161	161	238	238	285	317	103	103	107	107	182	182	207	207	233	237	262	262	277	281	090	094	139	139	158	158	197	207	250	252	263	263
229	Algeria	ADRAR	Azawad	107	121	107	107	150	150	157	161	238	242	295	323	103	107	105	107	172	188	207	207	233	233	254	262	285	297	094	100	139	139	158	158	197	197	250	252	263	263
230	Algeria	ADRAR	Azawad	107	107	107	113	148	168	161	161	240	242	295	317	087	103	105	107	174	180	207	209	241	241	252	252	277	293	090	100	117	123	158	164	197	207	252	252	263	263
231	Algeria	ADRAR	Azawad	107	117	119	119	150	150	161	161	240	242	287	289	103	103	107	107	174	182	209	209	241	241	260	262	277	283	094	098	117	141	158	158	205	207	248	250	263	263
232	Algeria	ADRAR	Azawad	107	123	107	119	148	148	157	161	240	240	285	317	103	105	105	107	148	148	207	209	231	231	250	260	277	283	094	100	123	139	158	164	205	207	254	254	261	263
233	Algeria	ADRAR	Azawad	107	121	117	119	148	162	157	161	238	238	295	299	105	107	107	107	172	182	207	207	231	245	252	260	281	303	094	098	135	139	160	164	207	207	254	254	263	263
234	Algeria	ADRAR	Azawad	107	121	107	121	150	150	161	161	240	240	309	317	103	103	107	107	148	174	207	207	231	235	252	260	277	283	090	098	117	123	158	158	197	207	252	254	263	263
235	Algeria	ADRAR	Azawad	117	117	107	109	148	150	161	161	238	240	305	309	103	103	105	107	148	172	207	207	231	239	252	254	277	281	090	094	123	137	158	158	205	207	244	254	261	263
236	Algeria	ADRAR	Azawad	107	121	107	117	148	168	157	161	240	242	307	315	103	103	105	105	148	180	209	209	235	235	252	260	275	281	094	098	123	141	158	158	197	205	252	254	263	263
237	Algeria	ADRAR	Azawad	107	117	107	107	148	168	161	161	236	242	293	317	103	105	107	107	182	182	209	209	231	235	260	262	277	281	090	094	123	137	158	158	205	205	250	254	263	263
238	Algeria	ADRAR	Azawad	107	121	119	119	150	150	157	159	240	242	285	317	103	103	105	107	148	172	207	207	231	245	252	260	275	283	094	094	141	141	158	158	205	207	244	254	263	263
239	Algeria	ADRAR	Azawad	107	117	119	119	148	168	161	161	240	240	311	325	103	103	105	107	148	174	207	207	231	235	260	262	281	297	094	094	139	141	158	164	205	207	250	254	261	263
240	Algeria	ADRAR	Azawad	117	117	127	127	148	162	161	161	238	242	285	317	103	103	105	105	182	182	207	207	231	245	250	262	283	283	094	098	117	137	158	158	205	207	250	250	263	263
241	Algeria	ADRAR	Azawad	107	117	107	119	148	150	161	161	242	242	295	313	103	103	107	107	184	190	207	207	235	235	250	260	277	283	090	100	137	139	158	158	207	207	250	250	263	263
242	Algeria	ADRAR	Azawad	107	121	107	117	150	150	157	161	236	240	317	317	103	103	105	107	148	148	207	207	231	245	252	260	277	277	090	090	137	139	158	158	205	205	238	238	263	263
243	Algeria	ADRAR	Targui	107	107	119	119	150	162	159	161	240	242	307	317	103	103	105	107	182	182	207	207	235	245	260	260	297	297	090	094	123	137	158	158	197	205	250	250	263	263
244	Algeria	ADRAR	Targui	107	117	107	107	150	168	161	161	240	242	285	293	103	107	105	107	182	184	207	207	231	235	260	260	277	297	098	100	117	139	158	160	195	205	250	252	263	263
245	Algeria	TAMANRASSET	Targui	107	117	107	119	148	150	161	161	240	242	309	309	103	107	105	107	148	184	207	209	231	245	260	260	277	277	094	098	139	143	158	160	205	207	252	252	263	263
246	Algeria	TAMANRASSET	Targui	121	121	119	119	148	150	157	161	238	242	317	325	103	103	105	105	182	182	207	209	231	231	250	262	281	283	090	094	125	139	158	160	205	207	238	242	263	263
247	Algeria	TAMANRASSET	Targui	117	117	107	119	148	150	161	161	238	244	285	317	103	103	105	107	170	174	207	209	231	231	254	266	277	277	094	098	139	141	158	160	?	?	252	254	263	263
248	Algeria	TAMANRASSET	Targui	107	107	119	119	148	168	161	161	242	242	317	323	103	103	107	107	172	182	207	209	231	243	262	266	281	297	090	098	141	143	158	158	207	207	250	254	263	263
249	Algeria	TAMANRASSET	Targui	121	121	107	119	148	150	161	161	238	242	317	325	103	107	105	105	182	190	207	207	245	245	262	262	277	281	094	094	117	145	158	158	205	207	252	254	263	263
250	Algeria	TAMANRASSET	Targui	117	117	107	117	148	148	157	161	242	244	285	299	103	107	105	107	148	148	207	209	231	231	252	262	277	277	090	094	139	139	158	158	205	205	240	252	261	263
251	Algeria	TAMANRASSET	Targui	117	121	107	107	150	150	161	161	238	244	317	317	103	107	105	105	172	188	207	207	231	235	252	260	281	285	090	100	123	143	158	158	205	207	252	252	263	263
252	Algeria	TAMANRASSET	Targui	107	107	107	119	148	148	161	161	238	242	287	315	103	103	105	107	182	188	207	209	231	233	256	256	273	273	090	094	123	137	158	158	197	205	250	252	263	263
253	Algeria	TAMANRASSET	Targui	107	107	107	113	150	168	161	161	240	240	295	295	103	103	105	105	148	172	207	209	233	239	248	250	275	283	090	090	123	123	158	160	199	205	250	252	263	263
254	Algeria	TAMANRASSET	Targui	107	121	107	107	148	168	161	161	242	244	285	307	103	111	105	105	172	182	207	207	231	231	250	260	277	277	098	100	135	141	158	158	199	205	250	254	261	263
255	Algeria	TAMANRASSET	Targui	107	107	107	119	148	168	161	161	240	244	317	317	103	105	107	107	180	184	207	207	231	231	252	260	277	277	090	094	117	141	158	164	195	199	250	254	261	263
256	Algeria	TAMANRASSET	Targui	107	117	107	119	148	150	157	161	236	242	295	325	103	103	105	105	148	148	207	207	231	231	260	260	277	305	090	094	123	123	158	158	195	207	252	254	263	263
257	Algeria	TAMANRASSET	Targui	107	121	111	117	162	168	157	161	242	242	299	307	103	107	105	105	174	182	207	207	233	245	252	262	281	285	090	094	139	141	158	158	205	207	240	252	263	263
258	Algeria	TAMANRASSET	Targui	121	121	119	125	148	148	161	161	240	240	299	307	107	107	105	107	182	184	207	207	233	237	252	260	277	285	090	094	139	143	158	158	197	197	244	254	263	263
259	Algeria	TAMANRASSET	Targui	107	107	119	119	148	150	161	161	242	242	309	323	103	107	107	107	182	182	207	209	233	243	262	264	277	281	090	090	139	139	158	164	205	207	252	254	261	263
260	Algeria	TAMANRASSET	Targui	115	117	117	127	148	162	161	161	238	238	285	285	103	103	107	107	172	188	207	209	229	229	248	258	279	299	090	094	139	139	158	158	199	205	250	250	263	263
261	Algeria	TAMANRASSET	Targui	107	117	107	119	148	164	161	161	244	244	307	317	103	103	105	107	182	188	207	207	237	237	238	262	277	285	094	094	141	141	158	164	197	197	254	254	261	263
262	Algeria	TAMANRASSET	Targui	107	107	107	119	150	164	161	161	240	240	309	311	103	105	105	107	148	148	207	209	231	235	252	262	277	277	094	094	123	123	158	160	205	207	250	250	263	263
263	Algeria	TAMANRASSET	Targui	107	107	107	107	150	168	157	161	236	240	285	317	103	103	105	107	174	188	207	207	233	233	262	264	277	281	094	100	135	139	158	158	205	205	254	254	263	263
264	Algeria	TAMANRASSET	Targui	107	107	107	107	148	148	157	161	236	240	317	317	103	103	105	105	182	182	207	209	231	239	260	262	295	297	094	094	139	143	158	164	197	207	250	252	263	263
265	Algeria	TAMANRASSET	Targui	107	121	107	119	150	164	161	161	242	242	317	317	103	103	107	107	176	184	207	207	233	233	252	254	285	285	090	094	137	139	158	158	205	205	252	252	263	263
266	Algeria	TAMANRASSET	Targui	107	121	119	119	150	168	161	161	236	242	295	309	103	107	105	105	172	182	207	209	233	237	262	264	281	297	094	100	137	139	158	158	197	207	248	252	263	263
267	Algeria	TAMANRASSET	Targui	107	121	107	119	148	162	161	161	238	242	285	317	103	103	105	105	172	182	207	207	233	233	252	262	281	297	090	094	123	123	158	164	197	205	252	252	261	263
268	Algeria	TAMANRASSET	Targui	107	117	107	119	148	150	161	161	240	242	305	307	103	103	105	105	148	172	207	209	237	237	254	262	277	295	094	094	123	137	158	158	205	207	248	248	261	263
269	Algeria	TAMANRASSET	Targui	107	121	113	117	148	150	161	161	238	242	297	317	103	103	105	105	148	148	207	209	237	241	252	264	281	285	090	094	117	139	158	164	207	207	248	252	261	263
270	Algeria	TAMANRASSET	Targui	117	117	107	119	148	150	161	161	240	242	307	317	103	103	105	105	172	188	209	209	237	241	254	264	277	285	090	094	117	123	158	158	205	207	248	252	263	263
271	Algeria	TAMANRASSET	Targui	107	107	113	119	150	168	157	161	238	240	287	307	103	103	105	105	148	174	207	207	231	245	252	264	277	281	090	090	123	139	158	160	207	207	238	250	263	263
272	Algeria	TAMANRASSET	Targui	107	117	107	107	148	150	161	161	240	242	295	321	103	107	105	107	148	148	207	207	237	237	262	262	277	281	094	098	123	141	158	164	207	207	248	252	263	263
273	Algeria	TAMANRASSET	Targui	107	121	119	119	148	148	161	161	240	240	295	317	107	107	105	105	148	184	207	207	233	237	252	262	277	281	090	100	123	137	158	158	207	207	242	250	261	263
274	Algeria	TAMANRASSET	Targui	117	117	107	107	148	168	159	159	242	242	297	299	103	103	107	107	148	182	207	207	237	247	262	264	277	277	094	100	123	139	158	164	205	205	238	250	261	263
275	Algeria	TAMANRASSET	Targui	107	107	107	107	148	150	157	157	238	240	297	309	103	103	105	107	182	184	207	209	233	233	262	262	281	281	090	090	123	139	158	158	207	207	250	252	261	263
276	Algeria	TAMANRASSET	Targui	107	121	119	119	148	148	161	161	236	240	299	317	103	103	105	107	174	186	207	209	233	247	254	262	277	281	090	094	137	137	158	158	205	207	250	252	263	263
277	Algeria	TAMANRASSET	Targui	107	117	117	119	148	150	161	161	240	242	307	307	103	105	107	107	172	176	207	209	233	233	262	264	281	285	090	090	137	139	158	160	197	207	252	252	263	263
278	Algeria	TAMANRASSET	Targui	107	121	107	119	148	148	161	161	238	240	317	325	103	107	107	107	148	148	207	207	233	233	262	264	277	297	094	094	135	139	158	158	197	197	248	252	263	263
279	Algeria	TAMANRASSET	Targui	117	117	107	113	150	150	161	161	238	240	307	317	103	103	105	107	172	182	207	209	241	243	254	262	277	297	094	094	123	141	164	164	207	207	248	250	261	263
280	Algeria	TAMANRASSET	Targui	107	117	107	117	148	150	161	161	238	242	295	317	103	111	105	107	172	182	207	207	233	241	252	264	277	277	090	090	123	139	158	158	197	197	248	252	263	263
281	Algeria	TAMANRASSET	Targui	107	107	107	119	150	168	161	161	242	242	295	309	103	107	105	107	172	172	207	207	233	233	254	260	281	285	090	094	139	145	158	164	205	207	238	248	263	263
282	Algeria	TAMANRASSET	Targui	107	121	125	127	148	162	161	161	236	242	317	325	103	107	105	105	148	182	207	207	243	245	252	260	277	283	94	098	117	139	158	164	197	207	250	252	261	263
283	Algeria	TAMANRASSET	Targui	121	121	107	119	148	150	161	161	240	242	295	317	103	103	105	105	182	182	207	207	237	241	264	264	277	285	100	100	117	123	158	158	197	207	250	252	261	263
284	Algeria	TAMANRASSET	Targui	107	121	127	127	148	168	157	161	236	242	303	317	103	107	107	107	148	184	207	209	233	237	264	264	277	285	090	100	123	123	158	158	205	205	250	252	263	263
285	Algeria	TAMANRASSET	Targui	117	125	119	125	148	148	157	161	236	240	297	317	103	103	107	107	148	182	207	207	233	233	262	268	277	281	094	094	141	141	158	164	197	207	250	250	263	263
286	Algeria	TAMANRASSET	Targui	107	117	107	113	148	152	161	161	236	240	285	303	103	103	105	107	174	188	207	207	233	247	256	262	277	305	090	094	123	123	158	158	197	207	250	250	263	263
287	Algeria	TAMANRASSET	Targui	107	107	119	127	148	162	161	161	238	242	311	311	103	105	105	105	148	148	207	207	243	247	254	254	281	281	094	094	141	141	158	164	205	205	242	250	261	261
288	Algeria	TAMANRASSET	Targui	107	107	107	119	148	148	161	161	242	242	311	319	103	103	105	105	148	174	207	207	233	237	262	264	277	281	094	094	123	141	158	164	181	197	?	?	263	263
289	Algeria	TAMANRASSET	Targui	107	117	111	119	150	168	159	161	238	240	317	317	103	103	105	105	182	190	207	207	233	237	254	254	281	281	094	094	123	145	158	158	197	205	242	250	263	263
290	Algeria	TAMANRASSET	Targui	117	117	107	123	148	148	161	161	238	240	317	329	103	103	105	105	180	182	207	207	233	247	256	262	277	281	094	100	125	139	158	164	197	207	250	252	263	263
291	Algeria	TAMANRASSET	Targui	107	107	107	107	148	148	159	161	236	242	317	317	103	105	107	107	172	174	207	207	233	247	262	262	277	295	094	094	139	141	158	158	207	207	238	250	261	261
292	Algeria	TAMANRASSET	Targui	107	107	107	119	150	168	161	161	236	242	285	317	105	107	107	107	180	180	207	207	233	237	254	262	277	281	090	100	139	139	158	158	197	207	248	250	263	263
293	Algeria	TAMANRASSET	Targui	107	107	109	119	148	168	161	161	244	244	313	321	103	105	107	107	180	180	207	209	231	245	252	260	275	277	094	094	123	123	158	160	197	197	250	252	261	263
294	Algeria	TAMANRASSET	Targui	107	117	107	119	150	152	159	161	238	240	317	317	87	103	105	107	174	184	207	209	233	247	254	254	281	285	094	096	123	141	158	164	197	197	252	252	263	263
295	Algeria	TAMANRASSET	Targui	107	117	107	119	148	150	161	161	242	242	285	299	103	103	107	107	148	188	207	207	233	237	256	262	277	281	094	100	117	123	158	160	205	205	244	252	261	263
296	Algeria	TAMANRASSET	Targui	107	117	119	119	148	162	157	161	240	240	295	317	103	103	107	107	148	184	207	209	241	245	260	262	281	281	090	094	139	139	158	158	207	207	250	252	263	263
297	Algeria	TAMANRASSET	Targui	107	107	107	117	148	150	157	161	236	242	285	287	103	103	105	105	174	182	207	207	243	245	260	266	277	281	090	094	123	139	158	164	205	205	252	254	263	263
298	Algeria	TAMANRASSET	Targui	107	117	107	111	148	148	157	161	238	242	285	317	103	107	107	107	182	184	209	209	243	243	262	266	281	293	090	094	139	145	158	158	205	205	244	252	263	263
299	Algeria	TAMANRASSET	Targui	117	121	107	121	150	168	161	161	238	242	317	317	105	105	105	105	172	174	207	209	235	241	252	260	277	303	094	098	117	123	158	158	205	207	238	252	261	263
300	Algeria	TAMANRASSET	Targui	107	117	119	119	148	150	157	161	240	242	285	307	103	107	105	105	148	172	207	209	231	241	260	260	281	285	094	094	141	143	158	164	197	205	242	250	263	263
301	Algeria	TAMANRASSET	Targui	107	117	107	119	150	150	161	161	238	240	309	311	103	107	105	107	148	184	207	207	235	241	250	260	281	297	090	094	135	141	158	158	205	207	250	252	261	263
302	Algeria	TAMANRASSET	Targui	107	107	113	117	148	150	157	161	238	240	309	317	103	107	107	107	148	182	207	207	231	245	?	?	281	281	090	094	137	141	158	158	197	205	244	254	263	263
303	Algeria	TAMANRASSET	Targui	121	127	107	123	148	150	161	161	238	242	285	317	103	105	105	107	148	172	209	209	231	231	250	250	275	283	094	094	139	141	158	158	205	207	248	250	261	263
304	Algeria	TAMANRASSET	Targui	107	121	107	107	150	150	159	161	240	242	299	309	103	105	107	107	172	172	207	207	231	245	260	262	277	283	094	100	139	139	158	158	205	207	240	254	263	263
305	Algeria	TAMANRASSET	Targui	107	107	107	119	150	168	161	161	242	242	317	317	101	103	107	107	182	182	207	209	235	235	260	260	283	305	090	094	123	139	158	164	197	197	248	252	263	263
306	Algeria	TAMANRASSET	Targui	107	117	107	107	150	162	157	161	236	242	323	327	103	107	105	107	182	182	207	207	231	239	252	262	277	281	090	094	139	143	158	164	205	207	252	252	263	263
307	Algeria	TAMANRASSET	Targui	107	117	107	117	150	162	161	161	238	242	317	317	103	103	105	107	148	182	207	207	231	231	260	260	277	285	090	098	117	139	158	164	205	207	250	252	263	263
308	Algeria	TAMANRASSET	Targui	107	117	107	119	148	150	159	161	240	240	317	325	103	105	107	107	148	172	207	207	231	239	254	260	277	303	090	100	117	139	158	160	205	207	250	250	263	263
309	Algeria	TAMANRASSET	Targui	107	121	107	107	148	150	161	161	236	242	293	311	103	107	107	107	148	182	207	207	235	245	260	260	277	285	090	094	123	141	158	158	197	205	240	250	263	263
310	Algeria	TAMANRASSET	Targui	107	107	119	119	146	148	159	161	240	240	287	317	111	111	105	107	174	180	207	209	231	231	260	262	277	277	094	098	139	145	158	164	205	207	252	254	263	263
311	Algeria	TAMANRASSET	Targui	107	117	107	107	150	150	161	161	238	242	293	321	103	107	105	107	174	180	207	209	231	231	252	252	277	281	094	100	123	123	158	158	207	207	250	254	263	263
312	Algeria	TAMANRASSET	Targui	107	117	107	117	150	150	161	161	240	242	287	317	103	103	107	107	182	184	207	207	231	245	254	254	277	281	090	98	135	137	158	158	205	207	240	250	263	263
313	Algeria	TAMANRASSET	Targui	121	121	107	107	150	150	161	161	240	242	311	317	103	107	107	107	174	182	207	207	231	231	262	262	277	297	094	100	117	141	158	164	205	205	254	254	263	263
314	Algeria	TAMANRASSET	Targui	107	117	119	119	148	150	161	161	242	242	309	317	103	103	107	107	148	184	207	207	231	245	260	264	293	303	094	098	139	141	158	158	197	205	250	252	261	263
315	Algeria	TAMANRASSET	Targui	107	121	107	119	148	150	159	161	236	242	299	303	103	113	105	107	180	182	207	209	231	245	252	260	277	305	090	094	123	123	158	164	207	207	250	252	261	263
316	Algeria	TAMANRASSET	Targui	117	121	107	125	162	168	157	161	240	242	317	317	105	107	107	107	174	180	207	207	231	245	250	260	283	283	090	090	117	137	158	158	191	205	242	250	263	263
317	Algeria	TAMANRASSET	Targui	117	117	107	117	148	150	161	161	238	242	299	317	103	103	105	107	148	182	207	209	235	239	252	262	277	281	090	094	123	135	158	158	205	207	252	252	263	263
318	Algeria	TAMANRASSET	Targui	107	107	107	119	150	150	161	161	236	238	291	295	107	107	105	107	148	172	207	207	239	243	260	262	281	285	094	100	139	139	164	164	197	197	250	252	261	263
319	Algeria	TAMANRASSET	Targui	115	121	113	119	148	168	157	161	240	240	291	317	103	103	107	107	182	182	207	209	231	239	252	260	285	297	090	094	139	139	158	164	205	205	240	254	263	263
320	Algeria	TAMANRASSET	Targui	117	117	107	107	150	150	161	161	236	242	311	323	103	105	105	107	182	186	207	207	235	239	260	260	277	281	094	094	139	139	158	164	205	207	240	254	263	263
321	Algeria	TAMANRASSET	Targui	119	119	117	117	150	150	161	161	236	238	297	315	103	103	105	107	182	188	207	209	231	241	252	254	293	297	094	094	123	141	158	158	205	207	250	254	261	263
322	Algeria	TAMANRASSET	Targui	107	117	117	119	148	148	161	161	240	242	309	329	105	105	107	107	172	182	207	207	231	235	260	260	277	293	094	094	139	139	158	158	205	205	252	252	263	263
323	Algeria	TAMANRASSET	Targui	107	117	113	119	148	150	161	161	240	242	317	325	103	103	105	107	174	182	207	209	231	231	254	260	281	299	094	094	137	139	158	164	205	207	252	252	263	263
324	Algeria	TAMANRASSET	Targui	107	107	113	117	148	150	157	161	236	236	285	285	103	107	105	107	148	184	207	207	231	235	260	260	281	281	094	094	137	139	158	158	205	207	252	252	261	263
325	Algeria	TAMANRASSET	Targui	107	121	117	119	148	148	157	161	240	242	289	317	103	105	105	105	172	184	207	209	231	235	260	262	277	277	094	094	139	139	158	158	205	207	240	244	261	263
326	Algeria	TAMANRASSET	Targui	107	117	119	119	148	150	157	161	240	242	285	307	103	107	105	105	148	172	207	209	231	243	260	260	281	285	094	094	141	143	158	164	199	205	244	250	263	263
327	Algeria	TAMANRASSET	Targui	121	121	117	119	150	150	161	161	240	242	285	311	103	107	107	107	180	190	207	209	231	231	260	260	277	281	090	090	139	143	158	158	205	205	250	252	263	263
328	Algeria	TAMANRASSET	Targui	107	107	107	107	148	148	161	161	236	238	311	311	103	107	107	107	148	174	207	207	231	245	260	262	277	285	090	094	139	139	158	164	199	205	250	254	263	263
329	Algeria	TAMANRASSET	Targui	117	121	113	119	148	150	157	161	238	242	289	305	103	103	105	107	182	188	207	207	231	231	252	266	277	281	090	094	123	139	158	158	205	207	252	254	261	263
330	Algeria	TAMANRASSET	Targui	117	121	107	117	148	150	161	161	240	242	285	317	103	103	105	105	180	184	207	207	231	235	260	260	277	281	090	090	135	139	158	164	199	205	250	254	263	263
331	Algeria	TAMANRASSET	Targui	107	121	107	119	148	150	157	161	226	242	297	309	103	103	105	107	148	182	207	207	231	245	254	254	293	293	090	090	123	123	158	164	205	207	240	254	261	263
